# Supplementary material for: Transcriptome and Metabolite Profiling of Tomato SGR-Knockout Null Lines Using the CRISPR/Cas9 System
Source: MDPI journal article supplement (doi:10.3390/ijms24010109), 2022-12-21
Supplement: s1 [file s1]

## Supplementary Data

### Transcriptome and Metabolite Profiling of Tomato SGR-Knockout Null Lines Using the CRISPR/Cas9 System

Jin Young Kim, Jong Hee Kim, Young Hee Jang, Jihyeon Yu, Sangsu Bae, Me-Sun Kim, Yong-Gu Cho, Yu Jin Jung and Kwon Kyoo Kang

#### Contents

**Table S1.** Design of sgRNAs for CRISPR genome editing on *SlSGR1* gene in tomato using the CRISPR RGEN tool program (<http://www.rgenome.net/>).

**Table S2.** Detection of mutations on the putative off-target sites in edited plants.

**Table S3.** Oligonucleotide primers for mutation analysis in the putative off-target sites in edited plants.

**Table S4.** Determination of carotenoid contents in *sgr1* #1-6, *sgr1* #2-4 and WT leaves.

**Table S5.** Primer list, oligonucleotide sequence and purpose used in this study.

**Table S6.** Log2 fold change of metabolite between the *sgr1* #1-6 and wild type control.

**Figure S1.** Resequencing analysis of gene edited plants. a Mapping of genome sequences of transgenic plant contained b mapping of genome sequences of *sgr1* #1-6 lines, c mapping of genome sequences of *sgr1* #2-4 lines, Light blue highlights indicate the annotated vector regions. The solid red line marks the average genome coverage, and the dashed lines are the half and the double of the coverage. The T-DNA, which is enclosed by left and right borders (LB/RB), shows 20× coverage as expected for a single copy locus.

**Supplementary Table S1.** Design of sgRNAs for CRISPR genome editing on *SlSGR1* gene in tomato using the CRISPR RGEN tool program (<http://www.rgenome.net/>).

| SGR1   | sgRNA Target (5' to 3') | Direction | GC Contents<br>(%, w/o PAM) | Out-of-frame<br>Score | Mismatches |   |   |   |
|--------|-------------------------|-----------|-----------------------------|-----------------------|------------|---|---|---|
|        |                         |           |                             |                       | 0          | 1 | 2 | 3 |
| sgRNA1 | GTCCATTGCCACATTAGTGGAGG | +         | 50.0                        | 62.9                  | 1          | 0 | 0 | 0 |
| sgRNA2 | CCCCAGTGAGTGTTATGCCTTGG | +         | 55.0                        | 70.9                  | 1          | 0 | 0 | 0 |

**Supplementary Table S2** Detection of mutations on the putative off-target sites in edited plants.

| Target  | Putative off-target | Off-target locus       | Sequence of off-target site | No. of mutation plants |
|---------|---------------------|------------------------|-----------------------------|------------------------|
| sgRNA 1 | OFF 1               | ch01:24349961-24349683 | GaCCcTTGCCAtATTcGTGGAGG     | 0                      |
|         | OFF 2               | ch03:14040183-14040205 | GTCCATTGaCtgATaAGTGGAGG     | 0                      |
|         | OFF 3               | ch04:38450518-38450540 | GaCCATTGCCACAccAcTGGAGG     | 0                      |
|         | OFF 4               | ch08:1675678-1675700   | GTCCAcaGCCACgTTAcTGGGGG     | 0                      |
| sgRNA 2 | OFF 1               | ch07:17871427-17871449 | CgttAGTGAGTGcTATGCCTAGG     | 0                      |
|         | OFF 2               | ch07:35441694-35441716 | CattgGTGAGTGTTATGCCTAGG     | 0                      |
|         | OFF 3               | ch10:54619271-54619293 | gCCCAtTGAGTGTTcTaCCTCGG     | 0                      |

**Supplementary Table S3.** Oligonucleotide primers for mutation analysis in the putative off-target sites in edited plants.

| Off-target site | Primers | Sequence (5'→3')      |
|-----------------|---------|-----------------------|
| sgRNA 1         | FW      | AAATTCAGAATGCCCTGTCG  |
| OFF1            | RV      | TCATGAACAGTTCCCGATCA  |
| sgRNA 1         | FW      | AACTGTAAAAGCGCCCATTG  |
| OFF2            | RV      | GGAATCAGTGTGTGGTGTCG  |
| sgRNA 1         | FW      | TGGCTCAAGCTCAATCAGAA  |
| OFF3            | RV      | AGGCGATCCATAAGACGATG  |
| sgRNA 2         | FW      | ATCATACACTGCCGCTTG TG |
| OFF1            | RV      | TAAGGCTTGCTGGTTTTTGG  |
| sgRNA 2         | FW      | TGTGGGGGTATCTAGCCAAG  |
| OFF2            | RV      | TGTTTCCTGGAGGAAGATCG  |
| sgRNA 2         | FW      | TGTAGGCGCTTTCCTGAAGT  |
| OFF3            | RV      | CATCCCCGATTAACAGAACG  |

**Supplementary Table S4.** Determination of carotenoid contents in *sgr1* #1-6, *sgr1* #2-4 and WT leaves.

| samples          | violaxantin |      | lutein |      | zeaxantin |     | 13Z- $\beta$ -carotene |     | $\alpha$ -carotene |     | $\beta$ -carotene |      | 9Z- $\beta$ -carotene |      | others |      | total   |       |
|------------------|-------------|------|--------|------|-----------|-----|------------------------|-----|--------------------|-----|-------------------|------|-----------------------|------|--------|------|---------|-------|
|                  | mean        | SD   | mean   | SD   | mean      | SD  | mean                   | SD  | mean               | SD  | mean              | SD   | mean                  | SD   | mean   | SD   | mean    | SD    |
| WT               | 221.3       | 11.9 | 925.2  | 39.3 | 22.6      | 2.4 | 37.0                   | 1.3 | 35.0               | 0.5 | 607.7             | 24.3 | 92.5                  | 6.6  | 543.4  | 22.2 | 2484.6  | 108.5 |
| <i>sgr1</i> #1-6 | 527.1       | 12.4 | 311.7  | 20.4 | 74.5      | 5.3 | 41.1                   | 2.7 | 36.1               | 2.9 | 844.6             | 6.0  | 121.3                 | 5.1  | 379.5  | 11.3 | 2335.9  | 266.2 |
| <i>sgr1</i> #2-4 | 589.4       | 3.7  | 352.8  | 94.1 | 68.2      | 7.4 | 47.7                   | 3.9 | 39.5               | 4.4 | 944.2             | 98.5 | 135.1                 | 19.8 | 267.4  | 53.5 | 2444..3 | 285.3 |

\*Data are expressed as mean (the average value of content for dry weight) and SD (the standard deviation value) of three independent experiments. Carotenoid contents were calculated as  $\mu\text{g g}^{-1}$  dry weight of leaf tissues.

**Supplementary Table S5.** Primer list, oligonucleotide sequence and purpose used in this study.

| Primers               | Sequence (5'→3')                                             | Purpose                          |
|-----------------------|--------------------------------------------------------------|----------------------------------|
| sgRNA1 up             | gattGTCCATTGCCACATTAGTGG                                     | Vector construction              |
| sgRNA1 down           | aaacCCACTAATGTGGCAATGGAC                                     |                                  |
| sgRNA2 up             | gattCCCCAGTGAGTGTTATGCCT                                     |                                  |
| sgRNA2 down           | aaacAGGCATAACACTCACTGGGG                                     |                                  |
| pBOsC sgSEQ Fw        | CAGCTTGGCTCTAGTCGACC                                         | Confirm of sgRNA in pKAtC vector |
| sgRNA scaffold region | cggtgccactttttcaagtt                                         |                                  |
| Kanamycin-R Fw        | ATGATTGAACAAGATGGATTGCAC                                     | Transgenic plant identification  |
| Kanamycin-R Rv        | TCAGAAGAACTCGTCAAGAAGGC                                      |                                  |
| NGS sg1 1st Fw        | AAATCCCACACATCACATGC                                         | NGS analysis                     |
| NGS sg1 1st Rv        | TCAAGGCTTTTGTTTCATGGA                                        |                                  |
| NGS sg1 2nd Fw        | acactctttccctacacgacgctcttccgatctTTGCAGTTGCAAGGTTGGTA        |                                  |
| NGS sg1 2nd Rv        | gtgactggagttcagacgtgtgctcttccgatctATGTCGTTCGAACTTCCCAA       |                                  |
| NGS sg2 1st Fw        | GGAATTATCCAGAGTTACAAGAAGC                                    |                                  |
| NGS sg2 1st Rv        | GTTGGGTTGTGCCTAAATCAA                                        |                                  |
| NGS sg2 2nd Fw        | acactctttccctacacgacgctcttccgatctGGGTAGGTGGGGTGAAGAGT        |                                  |
| NGS sg2 2nd Rv        | gtgactggagttcagacgtgtgctcttccgatctTGTTTGGTTTATTATGTGATTTGATG |                                  |
| <i>S/SGR1</i> Fw      | TTCTTCTGGTGGGGTAGGTG                                         |                                  |

|                    |                       |
|--------------------|-----------------------|
| <i>SISGR1</i> Rv   | AGGCATAA CACTCACTGGGG |
| <i>SIPSY1</i> Fw   | TAGCACAGGCAGGTCTATCC  |
| <i>SIPSY1</i> Rv   | CCTTTCTCTGCCTCATCAAA  |
| <i>SIPSY2</i> Fw   | TAGCACAGGCAGGTCTATCC  |
| <i>SIPSY2</i> Rv   | GTCGTTTGCTTCAATCTCGT  |
| <i>SIPDS</i> Fw    | ATTAGCCGGTGACTACACG   |
| <i>SIPDS</i> Rv    | CCGACA ACTTCTTTTGGCTA |
| <i>SIGGPS</i> Fw   | AAAATACGGTCGAGCTGTTG  |
| <i>SIGGPS</i> Rv   | AATGCCATAAACGCTGACAT  |
| <i>SIZDS</i> Fw    | GGACCTGGTAAAGACCCATT  |
| <i>SIZDS</i> Rv    | TGCCTACCTGAAAGAGTTGC  |
| <i>SICRTISO</i> Fw | GACCCACAGACGATACCTTG  |
| <i>SICRTISO</i> Rv | CTTGTCCTGGGAAGCAACTA  |
| <i>SILCY B</i> Fw  | TGCTGGTATGGTTCATCCTT  |
| <i>SILCY B</i> Rv  | CCAAACAGATGCCGATAACT  |
| <i>SILCY E</i> Fw  | CTACGATTGAACACCCTTGG  |
| <i>SILCY E</i> Rv  | ATAACCTGTGGCTGGATGAA  |
| <i>SIPSY3</i> Fw   | TAGACCTCGAGAATCGTTTCG |
| <i>SIPSY3</i> Rv   | CCACAATTACGCCTCAGTTC  |
| <i>SlFabG</i> Fw   | CCGTTGAGAACACATGGAAC  |
| <i>SlFabG</i> Rv   | GATGAGAAAATCGGGACACC  |
| <i>SlAP2a</i> Fw   | TGAAGTTGAAGCTGCCAGAG  |
| <i>SlAP2a</i> Rv   | TGGTCCGTTGCATTATCAGT  |
| <i>SIDDTFR8</i> Fw | CTTGACGCATTCCAGTGTTT  |

RT-PCR  
analysis

---

|                     |                         |
|---------------------|-------------------------|
| <i>SIDDTFR8</i> Rv  | GCCCTTTCAGATCCTTCAAA    |
| <i>SIRIN</i> Fw     | ACATCATGGCATTGTGGTG     |
| <i>SIRIN</i> Rv     | GCTGCATTTTCGGGTTGTA     |
| <i>SILOXB</i> Fw    | GGTGGCCTAAACTGCAAAC     |
| <i>SILOXB</i> Rv    | GGCGATTAGGGAGATAACCA    |
| <i>SIERF-D2</i> Fw  | CTGCATTGAGATTTCGAGGA    |
| <i>SIERF-D2</i> Rv  | TTAGAGGGGATGGATTGGAG    |
| <i>SlloxC</i> Fw    | GGGTAACTTCTGGCCATCAT    |
| <i>SlloxC</i> Rv    | CAAGAACCACTCCCATTTCCT   |
| <i>SIACO1</i> Fw    | GCGCCACTCTATTGTGGTTA    |
| <i>SIACO1</i> Rv    | TGCATCACTTCCTGGATTGT    |
| <i>SIACO6</i> Fw    | GCCACTCCATTGTCATCAAC    |
| <i>SIACO6</i> Rv    | AACGAAGCCAAGGACATTCT    |
| <i>SIACTIN</i> – FW | GGGATGGAGAAGTTTGGTGGTGG |
| <i>SIACTIN</i> – RV | CTTCGACCAAGGGATGGTGTAGC |

---



**Supplementary Table S6.** Log2 fold change of metabolite between the *sgr1* #1-6 and wild type control.

| Metabolite           | <i>sgr1</i> #1-6 / WT leaf | <i>sgr1</i> #1-6 / WT Fruit |
|----------------------|----------------------------|-----------------------------|
| Sucrose              | 0.24                       | -2.13                       |
| galactinol           | 2.11                       | 1.86                        |
| Raffinose            | 0.42                       | 0.29                        |
| Glucose              | 0.15                       | 0.62                        |
| Xylose               | 1.12                       | 0.73                        |
| Fructose             | 0.52                       | 0.23                        |
| Dehydroascorbate     | 0.21                       | 0.98                        |
| Galacturonate        | 0.24                       | 0.87                        |
| Rahamnose            | 0.91                       | 1.25                        |
| G6P                  | -1.74                      | 1.64                        |
| erythritol           | 0.08                       | -1.58                       |
| <i>myo</i> -inositol | 1.11                       | -1.54                       |
| saccharate           | 0.01                       | -2.24                       |
| glucar.lac           | -0.54                      | 0.89                        |
| Trehalose            | 1.46                       | -0.48                       |
| Maltose              | 0.41                       | -0.49                       |
| maltotriose          | -1.55                      | 2.05                        |
| F6P                  | 0.91                       | -1.35                       |
| tryptiophan          | 0.67                       | -1.29                       |
| Phenylalanine        | 0.48                       | -0.37                       |
| caffeoulquinic acid  | -2.31                      | 2.18                        |
| caffeate             | -0.31                      | -1.17                       |
| Valine               | 0.58                       | 0.61                        |
| Alanine              | 0.37                       | 1.21                        |
| Leucine              | 2.04                       | 1.51                        |
| Citrate              | 2.15                       | 2.07                        |

|                  |       |       |
|------------------|-------|-------|
| Glutamate        | -0.13 | 0.48  |
| Ornithine        | 1.87  | 1.91  |
| Putrescine       | 2.08  | 0.01  |
| 4-Aminobutyrate  | 0.34  | 1.88  |
| Glutathion       | 2.31  | 1.77  |
| Fumarate         | 1.24  | 0.46  |
| Malate           | -0.03 | -0.58 |
| Aspartate        | 0.61  | 1.14  |
| Asparagine       | 2.11  | 1.79  |
| $\beta$ -alanine | 2.06  | 1.99  |

---

\*Student's *t*-test was performed to compare *sgr1* #1-6 with wild type ( $P < 0.05$ ; n = 5)

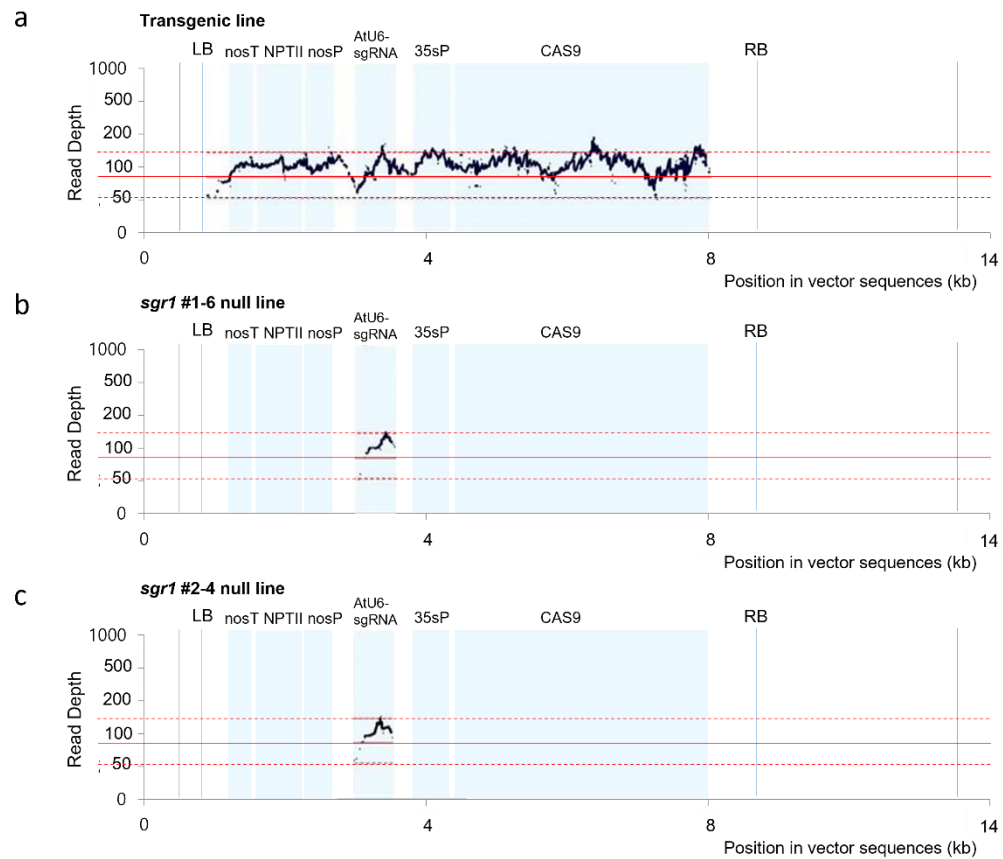

**Supplementary Figure S1.** Resequencing analysis of gene edited plants. a Mapping of genome sequences of transgenic plant contained b mapping of genome sequences of *sgr1* #1-6 lines, c mapping of genome sequences of *sgr1* #2-4 lines, Light blue highlights indicate the annotated vector regions. The solid red line marks the average genome coverage, and the dashed lines are the half and the double of the coverage. The T-DNA, which is enclosed by left and right borders (LB/RB), shows 20× coverage as expected for a single copy locus.
